# Supplementary material for: Label-Free Detection of Neuronal Differentiation in Cell Populations Using High-Throughput Live-Cell Imaging of PC12 Cells
Source: PubMed Central journal article supplement (PMC3579923; doi:10.1371/journal.pone.0056690), 2013-02-22

Specific DNA fragmentation (%)

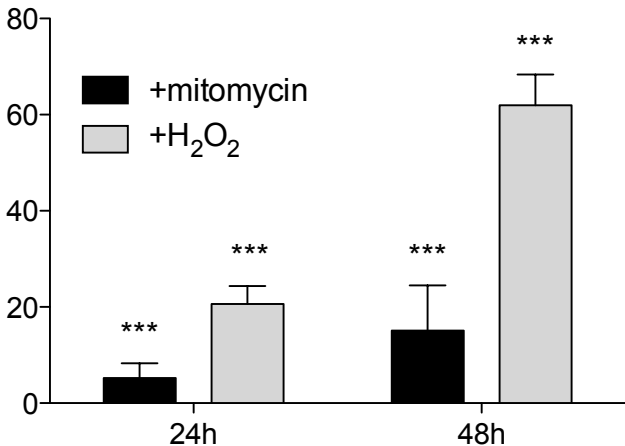

Supplement: pone.0056690.s002.pdf [file pone.0056690.s002.pdf]
